# Supplementary material
Source: PubMed Central journal article supplement (PMC5886852)
Supplement: mmc1.pdf [file mmc1.pdf]

**Supplemental Table 1.** Custom overlapping HPV16 degenerate primers for **Ion Torrent** complete genome coverage.

| FOR primer name | Sequence (5'-3')           | REV primer name | Sequence (5'-3')             |
|-----------------|----------------------------|-----------------|------------------------------|
| HPV16_1_F       | ACAGTTACTGCGACGTGAGG       | HPV16_1_R       | TGGAATCTTTGCTTTTTGTCC        |
| HPV16_2_F       | TCAAAAGCCACTGTGTCCTG       | HPV16_2_R       | TTCATCCTCCTCCTCTGAGC         |
| HPV16_3_F       | TTGCAACCAGAGACAACCTGA      | HPV16_3_R       | TTCTGAGAACAGATGGGGCAC        |
| HPV16_4_F       | GCGTACAAAGCACACACGTA       | HPV16_4_R       | CTGTCATTTTCGTTCTCGTCA        |
| HPV16_5_F       | ACGGGATGTAATGGATGGTT       | HPV16_5_R       | TGTTGTTTTGCTTCCTGTGC         |
| HPV16_6_F       | TTTAACACAGGCAGAAACAGAGAC   | HPV16_6_R       | CGCCCTTCTACCTGTAACATC        |
| HPV16_7_F       | GCTGCAAAAAGGAGATTATTTG     | HPV16_7_R       | ATTGCTGCCTTTGCATTACT         |
| HPV16_8_F       | TGCGAAACACCACTTACAAA       | HPV16_8_R       | CATTCCCCATGAACATGCTA         |
| HPV16_8B_F      | TGCCAAACACCACTTACAAA       | HPV16_8B_R      | CATTCCCCATGAACACGCTA         |
| HPV16_9_F       | GGTGTATTGCTGCATTTGGA       | HPV16_9_R       | TACGCAATTTTGGAGGCTCT         |
| HPV16_10_F      | TGTGTGTCTCCAATGTGTATGATG   | HPV16_10_R      | CCCATTGTACCATCGTGATAATTC     |
| HPV16_11_F      | ACACGCCAGAATGGATACAA       | HPV16_11_R      | CACATTGTTGCACAATCCTTT        |
| HPV16_12_F      | TGCACAATTGGCAGACACTA       | HPV16_12_R      | ACCTGTGTTAGCTGCACCAT         |
| HPV16_13_F      | AGATGTGATAGGGTAGATGATGGAG  | HPV16_13_R      | TTGTCATCTATGTAGTTCCAACAGG    |
| HPV16_14_F      | GCAGATGCCAAAATAGGTATG      | HPV16_14_R      | ACTGGATTTCCGTTTTGTC          |
|                 |                            | HPV16_14B_R     | ACTGGATTTCCGTTTTCGTC         |
| HPV16_15_F      | GATTGGTGGTGTTTACATTTCC     | HPV16_15_R      | CATTCTAGGCGCATGTGTTT         |
|                 |                            | HPV16_15B_R     | CATTCTAGGCGCATTTGTTT         |
| HPV16_16_F      | AAAACGATGGAGACTCTTTGC      | HPV16_16_R      | AGTTGCAGTTCAATTGCTTGT        |
| HPV16_17_F      | GTGCCAACACTGGCTGTATC       | HPV16_17_R      | TGCATATGTCTCCATCAAACCTG      |
| HPV16_18_F      | AAACATGGATATACAGTGGAAGTGC  | HPV16_18_R      | ATTACCTGACCACCCGCATG         |
| HPV16_19_F      | TGCAGTTTAAAGATGATGCAGA     | HPV16_19_R      | CGCTGGATAGTCGTCTGTGT         |
| HPV16_20_F      | TCTGTGTTTAGCAGCGACGA       | HPV16_20_R      | CAGTGAGGATTGGAGCACTG         |
| HPV16_20B_F     | TCTGTGTTTAGCAGCAACGA       |                 |                              |
| HPV16_21_F      | ACCCCTGCCACACCAATAAG       | HPV16_21_R      | TATGTCCTGTCCAATGCCATG        |
| HPV16_22_F      | CCATAGTACATTTAAAAGGTGATGC  | HPV16_22_R      | CGCCAGTAATGTTGTGGATG         |
|                 | TACACTTACATATGATAGTGAATGTC |                 |                              |
| HPV16_23_F      | AACG                       | HPV16_23_R      | CGTATGTAGACACAGACAAAAGCAG    |
| HPV16_24_F      | GTGTGCTTTTGTGTGTCTGCC      | HPV16_24_R      | TGTGTGCGCATTGTTAAGTGATAAC    |
| HPV16_25_F      | GGATAACAGCGGCCTCTGC        | HPV16_25_R      | AAAGTTGGGTAGCCGATGC          |
| HPV16_26_F      | GTTCTGCAAAACGCACAAA        | HPV16_26_R      | GGGGTCTTACAGGAGCAAGT         |
|                 |                            |                 | GGGATTATTATGTGTAGTAACAGTAGTA |
| HPV16_27_F      | GTACAGGCGGACGCACTG         | HPV16_27_R      | ACAG                         |
| HPV16_28_F      | TCAACTGATACCACACCTGCT      | HPV16_28_R      | GAGACCCTGGTATGGGTGTG         |
|                 |                            | HPV16_28B_R     | GAGACCCCGGTATGGGTGTG         |
|                 |                            | R               | TAAAATGTATTATCCACATCTATACCTT |
| HPV16_29_F      | AGCACAAAACCTAACACAGTAACTA  | HPV16_29_R      | C                            |
|                 | G                          |                 |                              |

|             |                            |             |                           |
|-------------|----------------------------|-------------|---------------------------|
| HPV16_29B_F | AGCACAAATCCTAACACAGTAACTAG |             |                           |
| HPV16_30_F  | GACCCCTGCTTTTGTAACCACTC    | HPV16_30_R  | GTACGCCTAGAGGTTAATGCTGG   |
| HPV16_31_F  | GCTCCAGATCCTGACTTTTTG      | HPV16_31_R  | AGTIGGTGAGGCTGCATGGG      |
|             |                            | HPV16_31B_R | AGTIGGTGAGGCTGCATGTG      |
|             | GTAGAATTGGTAATAAACAAACACT  |             |                           |
| HPV16_32_F  | ACG                        | HPV16_32_R  | GGAAGTAATGAAGGAGTTTGGTCAG |
| HPV16_33_F  | TTCCTGCAAATACAACAATTCC     | HPV16_33_R  | TACTGGGATAGGAGGCAAGTAGAC  |
| HPV16_34_F  | CATGTTACGAAAACGACGTAAA     | HPV16_34_R  | CCAAACTTATTGGGGTCAGG      |
| HPV16_35_F  | CTTGCAGTTGGACATCCCTA       | HPV16_35_R  | CACACCTAATGGCTGACCAC      |
| HPV16_36_F  | GTTTGGGCCTGTGTAGGTG        | HPV16_36_R  | TCCCCCTATAGGTGGTTTG       |
| HPV16_37_F  | AGCAAATGCAGGTGTGGATA       | HPV16_37_R  | TCCAGTGGAACTTCACTTTG      |
| HPV16_38_F  | CGGCTTTGGTGCTATGGAC        | HPV16_38_R  | GCAGTAGACCCAGAGTCTTTAATG  |
| HPV16_39_F  | TGGTGAAAATGTACCAGACGA      | HPV16_39_R  | GATATGGCAGCACATAATGACA    |
| HPV16_40_F  | ATGGCATTTGTTGGGGTAAC       | HPV16_40_R  | ACCAAAATTCCAGTCCTCCA      |
| HPV16_41_F  | TGTGCAAATAACCTTAACTGC      | HPV16_41_R  | TGCGTCCTAAAGGAAACTGA      |
|             | GGAGGCACACTAGAAGATACTTATA  |             |                           |
| HPV16_42_F  | GG                         | HPV16_42_R  | GAGGTGGTGGGTGTAGCTTTTC    |
| HPV16_43_F  | AAGGCCAAACCAAATTTACA       | HPV16_43_R  | GCATGACACAATAGTTACACAAGC  |
| HPV16_44_F  | GTTTGTATGTGCTTGTATGTGCTTG  | HPV16_44_R  | CGGTTGAAGCTACAAAATGGC     |
| HPV16_45_F  | GCCATTTTGTAGCTTCAACCG      | HPV16_45_R  | CAAGCCAAAATATGTGCCTAAC    |
| HPV16_46_F  | TAAATTA                    | HPV16_46_R  | ACTAACC                   |
| HPV16_46B_F | ACTATGCGCCAACG             |             |                           |
|             | TAAATCACTATGCGCCAACG       |             |                           |
| HPV16_47_F  | CAAACCGTTTTGGGTTACAC       | HPV16_47_R  | ATGCATAAATCCCGAAAAGC      |

**Supplemental Table 2.** Custom overlapping HPV16 PCR primers for **Sanger** complete genome coverage.

| Fragment         | Primer name  | Start position | Sequence (5'-3')     |
|------------------|--------------|----------------|----------------------|
| Fragment 1 outer | 16.3Fr1.Fout | 878 - 897      | CAGGTACCAATGGGGAAGAG |
| Fragment 1 outer | 16.3Fr1.Rout | 3894 - 3913    | GCACACAAAAGCAAAGCAA  |
| Fragment 1 inner | 16.3Fr1.Fin  | 901 - 920      | ACGGGATGTAATGGATGGTT |
| Fragment 1 inner | 16.3Fr1.Rin  | 3869 - 3888    | CGCCAGTAATGTTGTGGATG |
| Fragment 2 outer | 16.3Fr2.Fout | 3573 - 3592    | GCTCACACAAAGGACGGATT |
| Fragment 2 outer | 16.3Fr2.Rout | 6580 - 6601    | ATTATTGTGGCCCTGTGCTC |
| Fragment 2 inner | 16.3Fr2.Fin  | 3710 - 3729    | TGGCATTGGACAGGACATAA |
| Fragment 2 inner | 16.3Fr2.Rin  | 6533 - 6552    | TGGGCATCAGAGGTAACCAT |
| Fragment 3 outer | 16.3Fr3.Fout | 5933 - 5952    | GTTTGGGCCTGTGTAGGTGT |
| Fragment 3 outer | 16.3Fr3.Rout | 1078 - 1097    | TSTTTTGCTTCCTGTGCAGT |
| Fragment 3 inner | 16.3Fr3.Fin  | 6047 - 6066    | GCAAATGCAGGTGTGGATAA |
| Fragment 3 inner | 16.3Fr3.Rin  | 1054 - 1073    | AACGCATGTGCTGTCTCTGT |

## PERCENTAGE OF AMPLICONS EXCEEDING

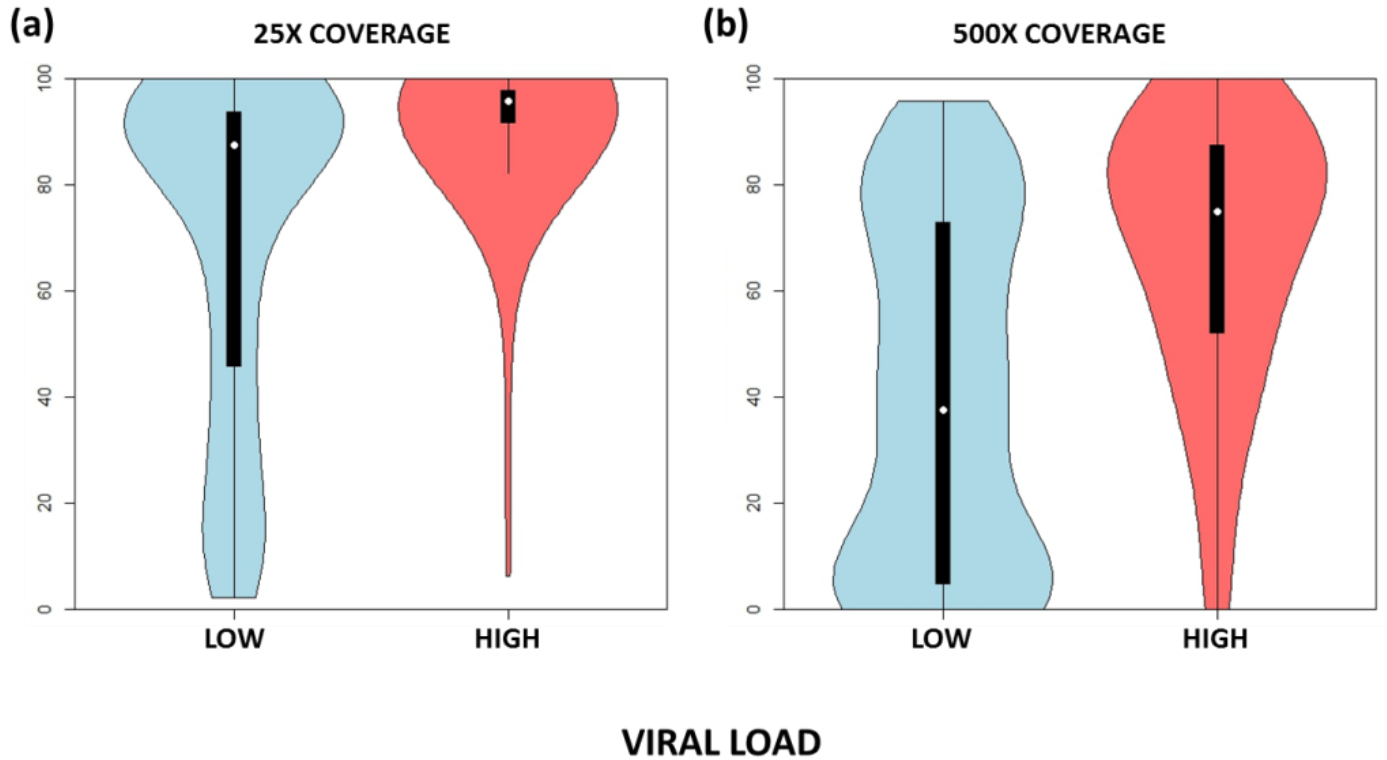

**Supplemental Figure 1.** Violin plots displaying the relationship between HPV16 viral load (low vs. high) and Ion Torrent sequence coverage greater than (a) 25x and (b) 500x coverage. Each violin is a box plot embedded into rotated kernel density plots. Medians are illustrated as white dots, black boxes indicate the interquartile range and black lines extend out 1.5 times the interquartile range. Filled regions are fitted density plots that capture the shape of the underlying density mass function.

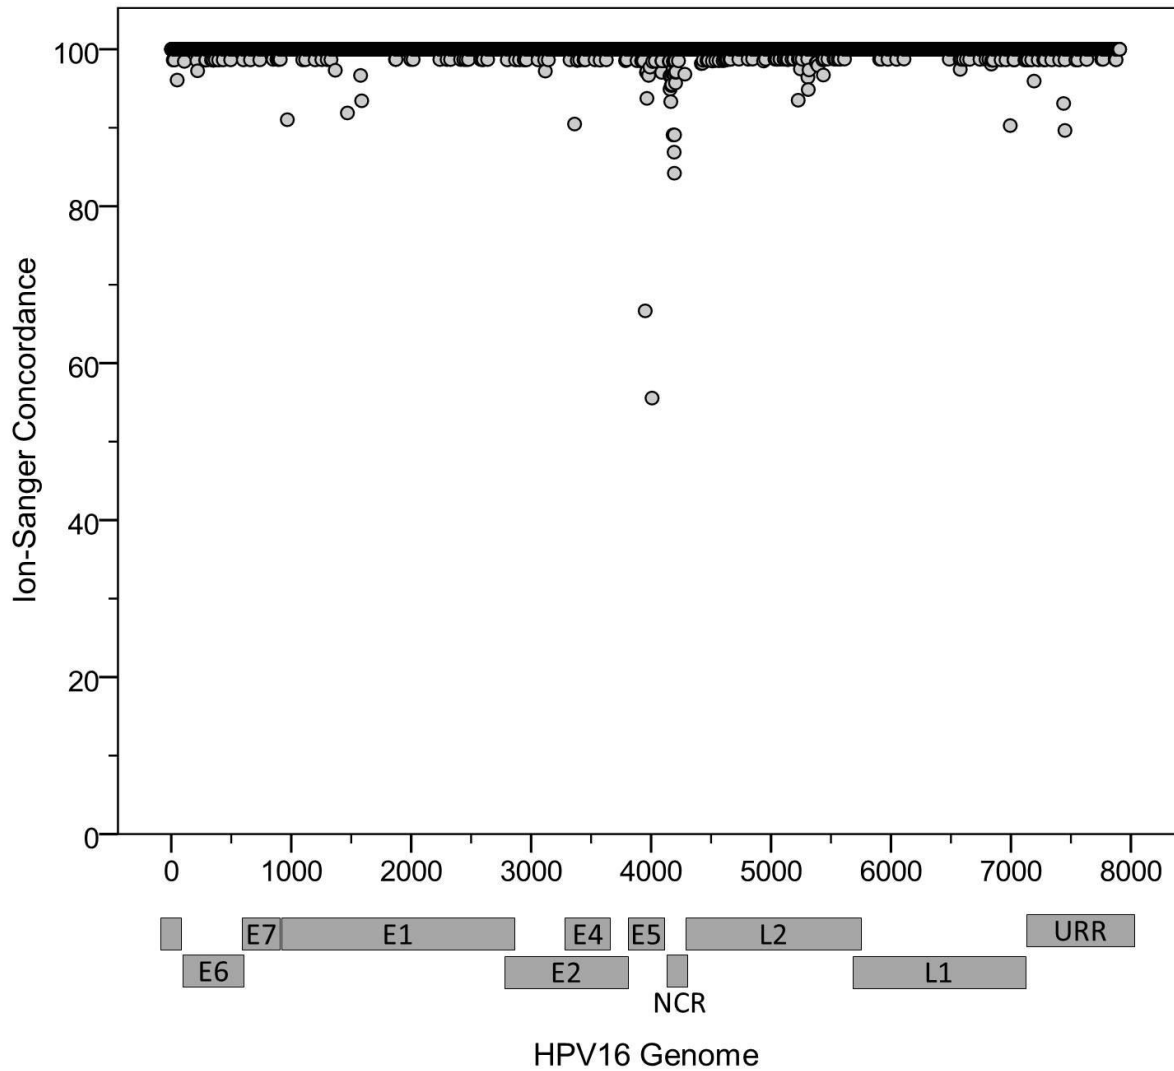

**Supplemental Figure 2.** Percent Ion Torrent and Sanger sequencing concordance by HPV16 genomic position. The approximate location of the HPV16 genes/regions (E6, E7, E1, E2/E4, non-coding region [NCR], L2, L1, upstream regulatory region [URR]) are illustrated relative to their genomic map position on the x-axis.

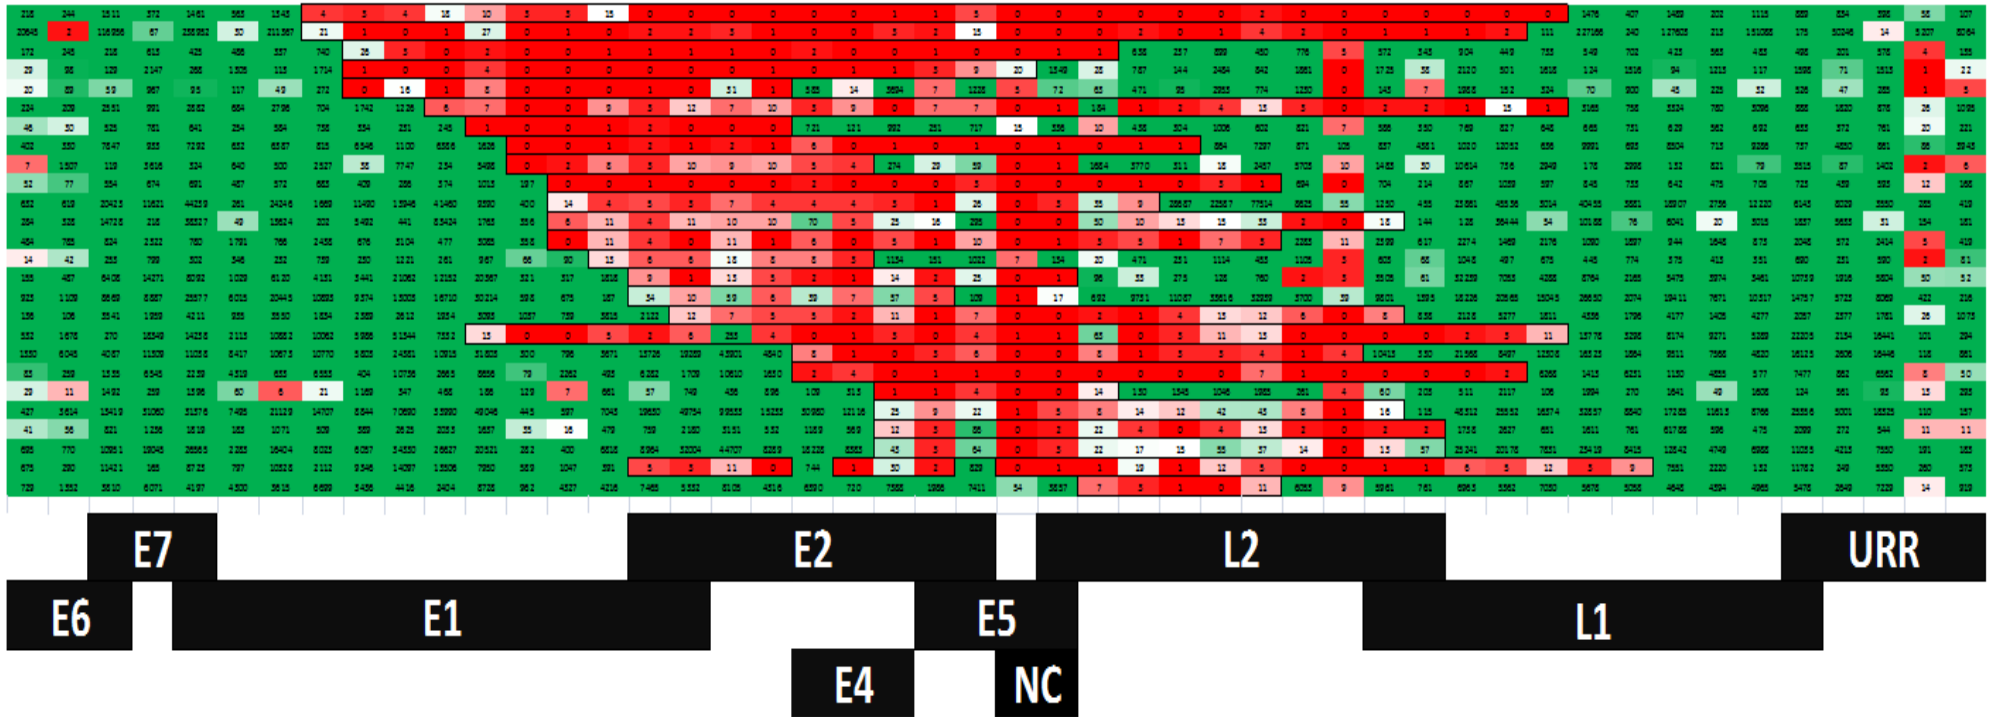

**Supplemental Figure 3.** Amplicon heat map of 26 HPV16 samples containing large central deletions. The heat map illustrates sequence depth across 48 overlapping amplicons (columns 1-48) for the 26 samples with deletions (rows 1-26), the sequence depths  $\geq 100x$  are green cells, depths of  $15x$  white cells and depths  $\leq 2x$  red cells. The physical boundaries of each deletion are defined by the bold outline surrounding all amplicons believed to be deleted in a given sample. Read counts within the deleted regions (red cells) are strikingly low compared to the read counts of flanking amplicons. The exaggerated overlap of adjacent HPV16 genes and regions (early genes: E6, E7, E1, E2, E4, E5; late genes: L2, L1; the upstream regulatory region, URR; non-coding region, NC) in the map reflects the overlapping design of the amplicons.
